# Supplementary material for: Genome-wide identification of the CAD gene family and functional analysis of putative bona fide CAD genes in tobacco (Nicotiana tabacum L.)
Source: Front Plant Sci. 2024 Jul 8;15:1400213. doi: 10.3389/fpls.2024.1400213 (PMC11261167; doi:10.3389/fpls.2024.1400213)
Supplement: Supplementary file 2 [file Table_1.xlsx]

## Sheet: Sheet1
ID	NCBI ID	DNA sequence	cDNA sequence
Ntab0529780	NM_001325471.1	ATGGGTGGCTTGGAAGTTGAGAAAACAACTATTGGTTGGGCTGCTAGAGACCCTTCTGGTGTACTTTCACCTTATACCTATACTCTCAGGTACATTACATTACTACTTATGTTCTTTCTATAATCGTAATATCCGAATCAGCTTATGCTTACCTCGACTACTTATTTTTATCTTATAATAACTATTCTACCAATTTTAAGATGAGTTATGAACTTTGTTTTTTGTTTTTCATGTCCAGAAACACAGGACCTGAAGATGTGGAAGTCAAAGTTTTGTATTGTGGGCTCTGCCACACTGATCTTCACCAAGTTAAAAATGATCTTGGCATGTCCAACTACCCTCTGGTTCCTGGGTATTTGCTCTTCCCTCTCTATTTTCCCTGTTTTTTCTCTCTCTCTC…	ATGGGTGGCTTGGAAGTTGAGAAAACAACTATTGGTTGGGCTGCTAGAGACCCTTCTGGT GTACTTTCACCTTATACCTATACTCTCAGAAACACAGGACCTGAAGATGTGGAAGTCAAA GTTTTGTATTGTGGGCTCTGCCACACTGATCTTCACCAAGTTAAAAATGATCTTGGCATG TCCAACTACCCTCTGGTTCCTGGACATGAAGTGGTGGGAGAAGTGGTGGAGGTAGGACCA GATGTGTCAAAATTCAAAGTGGGGGACACAGTTGGAGTTGGATTACTCGTTGGAAGTTGC AGGAACTGCGGCCCTTGCAAGAGAGATATAGAGCAATATTGCAACAAGAAGATTTGGAAC TGCAATGATGTCTACACTGATGGCAAACCCACC…
Ntab0262430	NM_001325984.1	ATGGGTAGCTTGGATGTTGAAAAATCAGCTATTGGTTGGGCTGCTAGAGACCCTTCTGGTCTACTTTCACCTTATACCTATACTCTCAGGTACGTTACATTAGTTCTTTCTATAATTGTGGTGTTCGCATCACCTCAACTACATTCTTATAATAACTATTCTACCAATTTTAAGATGAGTTATGAACCTTGTTTTTTTTTTAAATCATGTCCAGAAACACAGGACCTGAAGATGTGCAAGTCAAAGTTTTGTATTGTGGACTTTGCCACAGTGATCTTCACCAAGTTAAAAATGATCTTGGCATGTCCAACTACCCTCTGGTTCCTGGGTATTTTGCTCTTCCCTCTCTATTTTTCCTGCTTTATATCCTACATCAGATAATTTGAGAGTTCAAATTTT…	ATGGGTAGCTTGGATGTTGAAAAATCAGCTATTGGTTGGGCTGCTAGAGACCCTTCTGGT CTACTTTCACCTTATACCTATACTCTCAGAAACACAGGACCTGAAGATGTGCAAGTCAAA GTTTTGTATTGTGGACTTTGCCACAGTGATCTTCACCAAGTTAAAAATGATCTTGGCATG TCCAACTACCCTCTGGTTCCTGGACATGAAGTGGTGGGAAAAGTAGTGGAGGTAGGAGCA GATGTGTCAAAATTCAAAGTGGGGGACACAGTTGGAGTTGGATTACTCGTTGGAAGTTGT AGGAACTGTGGCCCTTGCAAGAGAGAAATAGAGCAATATTGCAACAAGAAGATTTGGAAT TGCAATGATGTCTACACTGATGGCAAACCCACC…
Ntab0704510	XM_016581632.1	ATGGGTAGTTTGGAAGTTGAGAAGAAAACCATAGGCTGGGCTGCCAAAGATCCTTCCGGTGTTCTGTCACCCTATTCCTACACTCTCAGGTGCTTTAATTTGCATTATTATATTCTAATGAGTAGTTCATTGTTTTCTACTATAATAATTACGGAGTTGTATTATTATTTTCATTTACAGAAAGACAGGCCCTGAAGATGTTGAAATCAAGGTGTTGTGCTGTGGACTCTGTCATACTGATCTTCACCAGGTCAAGAATGATCTTGGCATGTCCAATTACCCCATGGTTCCTGGGTATTTACATTACTCTCTCGAGATTGGCATGTTGTGATCATGCATATACTGTTTTCTTTTTCTTTTTTTTAGGGTACTAATTTGCAGCTTTTGATATTGAGAGGA…	ATGGGTAGTTTGGAAGTTGAGAAGAAAACCATAGGCTGGGCTGCCAAAGATCCTTCCGGT GTTCTGTCACCCTATTCCTACACTCTCAGAAAGACAGGCCCTGAAGATGTTGAAATCAAG GTGTTGTGCTGTGGACTCTGTCATACTGATCTTCACCAGGTCAAGAATGATCTTGGCATG TCCAATTACCCCATGGTTCCTGGACATGAAGTGGTTGGTGAAGTTGTGGAGGTTGGATCC AATGTCGCCAAGTTCAATGTGGGAGACACTGTTGGAGTAGGCGTGCTCGTCGGATGTTGC AGGAGCTGCCGCCCTTGCAACCAAGACATTGAGCAATACTGCAATAATAGGATCTGGAGC TACAATGATGTCTACTCTGATGGCAAACCTACC…
Ntab0868330	XM_016649991.1	ATGTGTTGCCCAGGTTGCGAGAGAGTTGTCAAAGACGCTATGCTCAAGCTTAGAGGTGCATAAATCGATATATACCAGCTTAATTATATATTGCCATTGTTGCTATATATCATTGAAATTTATCTTGAGAGAAAAAAAAAATTGTAATTGAAAGAATTTATGATCCATATGTCCGTCACAAATTTTTGACGGACTTGTGATGACCCTCATTTCCTCTAAGAAGGACAAATAGTTTTTTTTTCCCTTTTTTTTTTTTTTTTTTTTTTTGCCAAAAATACTTCTTTTTTTTTGTTTTTCCAGAATCCTCTTTTTCTCCAAAATTAAGGTGTTTGGCCAAACTTTTAGAAGGAAAGAATATAAGCAAAAACAATCTTTGAGAAGCATAAAAATGTATTTTCT…	ATGTGTTGCCCAGGTTGCGAGAGAGTTGTCAAAGACGCTATGCTCAAGCTTAGAGGGATA GACTCAGTGGAGGTGGACGTAGAGATGGAGAAGGTAACAGTGGTGGGATACATTGATCGG AAAAAGGTGCTAAAGGCAGTGAGAAGGACAGGAAAGAGGGCAGAATTCTGGCCATATCCT AATCCACCATTATATTTCACATCCTCAAATAACTATTTCAAAGACACGACGATAGAGTAC AAAGAGAGCTACAATTACTGGAGGCATGGCTACAATGCTACTGAAAAACATGGCAATTTA CCTGTTAGTCAACGAGGAGATGACAAATGCAGAATAGTTGAAATGACTTCTGCAAGTGCA GCGGAGAATTGCCTTGGTTGGGCAGCCCGAGAT…
Ntab0152820	XM_016622831.1	ATGACTTCTGCAAGTGTAAAGGAAAATTGCCTTGGTTGGGCAGCCCGAGATCCGTCTGGA TTTCTTTCACCTTACAAATTCAGCCGGAGGTACATTTACCACTTGCAATGTTTGAATGGC CTTTGCTGATGCATTATTTCTTTGCTTCTTCGTCTGTTTTCATCATTTGACAAGGGCTGT TCTATTTCTCCACTTTGGATTAGATGATCTTTAACTAACTTTAAATGGTTGAACTGTTGA TTTGATCTAGTTCTCGAGTTTTTTTAAGTAGCAGTGCTATTTATCTTCTGCTAAAATTTT CTTTTACTTGCCGCAGGACAGTTGGCAGTGATGATGTTCTGCTGGATATTTTGTTTTGTG GAATATGTTTCGCTGATATTGTCTGGACCAGGA…	ATGACTTCTGCAAGTGTAAAGGAAAATTGCCTTGGTTGGGCAGCCCGAGATCCGTCTGGA TTTCTTTCACCTTACAAATTCAGCCGGAGGACAGTTGGCAGTGATGATGTTCTGCTGGAT ATTTTGTTTTGTGGAATATGTTTCGCTGATATTGTCTGGACCAGGAATAAACATGGACAT TCAAAATATCCTCTAGTGCCAGGACATGAAATTGTGGGAACTGTGAGAGATGTTGGCACC AATGTTAAGCACTTTAAAGTTGGCGACCACGTTGGAGTTGGAACATATGTTAATTCGTGC AGGGAATGTGAATATTGTAATGATGGATTAGAGGTTCATTGCTCAAAAGGAGCAGTATAC ACTTTTGATGGTATAGACGTGGATGGTACTGTT…
Ntab0181830	XM_016614727.1	ATGGCTCAAACAACACCAAATCACACACAAAGTGTTTCTGGTTGGGCAGCTCATGATTCTTCTGGCAAGATCACACCTTTTACATTCAAGAGAAGGTAAATAATATTCACCACTTTGTTTTGCCATTTTCTTATCTTGTATAAATTGTTGGATTTAGGTTATGTATGGTGACAGTGTAAATATTTTCTACAGTATTAATATAATTTAACTTGTGATAATAGTTACTATATTATTATTTTTTTGAGCTACTAATCTTTTTTCTTTTACTTTTTTGGGTGAAATTTACCAGAGAAAATGGTGAGAATGATGTGACCATTGCGATCTTGTATTGTGGCATGTGTCATACGGATCTTCATCATGTCAAGAACGATTGGGGCATTACTATGTACCCTGTCGTGC…	ATGGCTCAAACAACACCAAATCACACACAAAGTGTTTCTGGTTGGGCAGCTCATGATTCT TCTGGCAAGATCACACCTTTTACATTCAAGAGAAGAGAAAATGGTGAGAATGATGTGACC ATTGCGATCTTGTATTGTGGCATGTGTCATACGGATCTTCATCATGTCAAGAACGATTGG GGCATTACTATGTACCCTGTCGTGCCTGGGCATGAGATAACTGGGATTGTAACAAAGGTG GGAAGCAATGTGACAAAATTCAAGAATGGAGATAGAGTAGGGGTAGGTTGTTTGGCAGCA ACATGTTTGAAGTGTGAGTATTGCAAGGATTCCCAAGAGAACTATTGTGACCAAGTCCAA TTCACTTACAATGGCATCTTTTGGGATGGCACT…
Ntab0554550	XM_016613123.1	ATGGCTAAAACAACCCAAAACCACACTCAAGTTGTTTCAGGATGGGCAGCTCTTGATTCTTCTGGCAAGATCACACCTTATATTTTCAATAGAAGGTATTCGTGATTTTCATGCATAAATATCTTTGCTACATAATATATATTCCATATTATATGATACTTTATTCATTTTAGTCTGTTCCAAAAAGAATAATGTATTTCTATATTTTTAAACTTTTTAATTTTTAACTTTTCATTTTGCTCTTTATTACATGTTCTTATAGCTAGAAAAGTTTTATAAGATTACAAGTTCTAGGAATATTTTTGGCATATATTAAAGTCTTCTACTTAGTCAAACTTTAAATCGTCTTCATATGAAGCGGAAGGGACGAAGTATTATACATTATGGTACTAAAGACAC…	ATGGCTAAAACAACCCAAAACCACACTCAAGTTGTTTCAGGATGGGCAGCTCTTGATTCT TCTGGCAAGATCACACCTTATATTTTCAATAGAAGAGAGAATGGTGTAAATGATGTGACC ATCAAGATTTTATACTGTGGAATCTGCCATACTGACCTTCACTATGCCAAAAATGATTGG GGTATCACTATGTATCCTGTAGTTCCTGGGCACGAGATTACAGGGATTGTTGTGGAAGTT GGGAGCAATGTAACCAACTTCAAAACAGGGGATAAAGTAGGAGTTGGGTGCATGTCAGCA TCTTGCTTAGAATGTGAATTTTGTAAAAACTCAGAAGAGAATTATTGTGACAAAGTTCAG TTCACTTACAATGGTGTCTTTTGGGATGGTAGT…
Ntab0336770	XM_016621995.1	ATGGCTAAAACAACCCCAAACCACACTCAAGTTGTTTCAGGATGGGCAGCTCTTGATTCTTCTGGCAAGATCACACCTTACATTTTCAATAGAAGGTATTCGTGATTTTCATGTATAAATATCTTTGCTACGTAATATATAGTATTCCATTTTATATGACACTCCATTTATTTTAGTCAGTTCCACAAAGAATCATGCACTTCTATATTTATGAACTTTTTAATTGTTAACTTTTCATTTGCTCTTGATTACATGCTCTTATAGCTAGAAAAGTGTTATAAGATGTTTAACACTACAAGTTCTAAGAATATTTTTGGCATATATTAAAAGTCTTCGCAAACTTTGTACTTAGTCAAACTATAAATGCCCTCGTATGAAGCGGAAGGGACGGAGTATTAT…	ATGGCTAAAACAACCCCAAACCACACTCAAGTTGTTTCAGGATGGGCAGCTCTTGATTCT TCTGGCAAGATCACACCTTACATTTTCAATAGAAGAGAGAATGGTGTAAATGATGTGACC ATCAAGATTTTATACTGCGGAATCTGCCATACTGACCTTCACTATGCCAAAAATGATTGG GGTATCACTATGTATCCTGTTGTTCCTGGGCATGAGATTACAGGGATTGTTGTGGAAGTT GGGAGCAATGTAACCAACTTCAAAACAGGGGATAAAGTAGGAGTTGGATGCATGTCAGCA TCTTGCTTAGAATGTGAATTTTGTAAAAACTCAGAAGAGAATTATTGTGACAAAGTTCAA TTCACATATAATGGTGTCTTTTGGGATGGTAGC…
Ntab0420320	XM_016614130.1	ATGGTTAAAGCACCAGAGAACGAACACCCACAAAAAGCTTTTGGGTGGGCTGCTAGGGACACCTCCGGAATTCTGTCGCCGTTCGATTTCTCTCGGAGGTAGGTAGCGCTACTTTTTGTTTGATGTTTATTTAACGTCTGGTAAATTGTTGGGTGTATTAATATTAATGTATGTCTCTGAAATGGAAGGACTTAAAAATGCTTAACTGTAACTTTTCATGCTATATCCATTCTTTGATGATTGCCATTAATTTTGCTCTTCACATACCTATACGACGTATATATATTTCGGTACATAAGCATGCATGACTTGACTTTGATTTAGTGGTGAGAGCATGGTAATGTCTTAATTATGGGCACATCTCAAGTTACTCTGTTGGTGCGGAGTTCCAATCGTTTG…	ATGGTTAAAGCACCAGAGAACGAACACCCACAAAAAGCTTTTGGGTGGGCTGCTAGGGAC ACCTCCGGAATTCTGTCGCCGTTCGATTTCTCTCGGAGACAAAATGGTGATGATGATGTT ACTGTCAGGATACTTTACTGTGGCGTATGTCACTCCGACTTGCATTGTTTGAAGAATGAG TGGGGATTCACAAAATACCCTATCGTCCCTGGGCATGAAATTGTTGGTCTAGTGACTGCA GTTGGCACTAGTGTCCATAGATTCAAGGTTGGTGACCGAGTTGGAGTTGGAGTGATTGTA GGCTCCTGTCACACGTGTGATATCTGTGAACAGAGCTTGGAAAACTATTGTCCCAAAGTT ATGTTCACCTACAACTCCACATACCATGACGGT…
Ntab0095940	XM_016638536.1	AGACAAAATGGTGATGATAATGTTACAGTCAAGATACTTTATTGTGGAGTATGTCACTCCGACTTGCATTGTTTGAAGAATATTGAGTGGGGATTCACAAATTACCCTATCATCCCTCGGTAAGCTGCTCAACCTCCTCCGGATATAGTATATATGTCCTAGATCCAATCTCATATGTGATGATTTGAACATATTTTTATGAACGTTATTTTATATAAAACATATATGGCATTTGATATTCTTTAATCATTGTTATTATTAATTATTTAATTAACTTGATAAGGTCCTTGACTAAATTTTGAGACTTGTCATCGTGATGAAGATCATGATAATGGGAGTGAACTTTCTTATAATTTAATCTAAATTTATTCCTGATCATATGATTATTGATTTGGACAT…	AGACAAAATGGTGATGATAATGTTACAGTCAAGATACTTTATTGTGGAGTATGTCACTCC GACTTGCATTGTTTGAAGAATATTGAGTGGGGATTCACAAATTACCCTATCATCCCTCGG CATGAAATTGTTGGTCTCGTGACTGCAGTTGGCACTAGTGTCCATAGATTCAATGTTGGT GACCGAGTTGGAGTTGGAGTGATTGTAGGCTCCTGTCAAACGTGTGATATCTGTGAACAG AGCTTGGAAAGCTATTGTCTCAAAGTTATGTTCACCTACAACTCCACATACCATGACGGT ACAAAGACATATGGTGGTTACTCCGATATGATAGTTGTTCATCAGCGCTTTGTTCTTGAA TTTCCTGAAAATCTACCTTCTGATGCTGGAGCA…
Nsyl0449860	XM_009803185.1	ATGGGTAGCTTGGATGTTGAAAAATCAGCTATTGGTTGGGCTGCTAGAGACCCTTCTGGTCTACTTTCACCTTATACCTATACTCTCAGGTACGTTACATTAGTTCTTTCTATAATTGTGGTGTTCGCATCACCTCAACTACATTCTTATAATAACTATTCTACCAATTTTAAGATGAGTTATGAACCTTGTTTTTTTTTTAAATCATGTCCAGAAACACAGGACCTGAAGATGTGCAAGTCAAAGTTTTGTATTGTGGACTTTGCCACAGTGATCTTCACCAAGTTAAAAATGATCTTGGCATGTCCAACTACCCTCTGGTTCCTGGGTATTTTGCTCTTCCCTCTCTATTTTTCCTGCTTTATATATATATATATAAGTGAGGATTTCTCAGTACCT…	ATGGGTAGCTTGGATGTTGAAAAATCAGCTATTGGTTGGGCTGCTAGAGACCCTTCTGGT CTACTTTCACCTTATACCTATACTCTCAGAAACACAGGACCTGAAGATGTGCAAGTCAAA GTTTTGTATTGTGGACTTTGCCACAGTGATCTTCACCAAGTTAAAAATGATCTTGGCATG TCCAACTACCCTCTGGTTCCTGGACATGAAGTGGTGGGAAAAGTAGTGGAGGTAGGAGCA GATGTGTCAAAATTCAAAGTGGGGGACACAGTTGGAGTTGGATTACTCGTTGGAAGTTGT AGGAACTGTGGCCCTTGCAAGAGAGAAATAGAGCAATATTGCAACAAGAAGATTTGGAAT TGCAATGATGTCTACACTGATGGCAAACCCACC…
Nsyl0290350	XM_009789161.1	ATGGGTAGTTTGGAAGTTGAGAAGAAAACCATAGGCTGGGCTGCCAAAGATCCTTCCGGTGTTCTGTCACCCTATTCCTACACTCTCAGGTGCTTTAATTTGCATTATTATATTCTAATGAGTAGTTCATTGTTTTCTACTATAATAATTACGGAGTTGTATTATTATTTTCATTTACAGAAAGACAGGCCCTGAAGATGTTGAAATCAAGGTGTTGTGCTGTGGACTCTGTCATACTGATCTTCACCAGGTCAAGAATGATCTTGGCATGTCCAATTACCCCATGGTTCCTGGGTATTTACATTACTCTCTCGAGATTGGCATGTTGTGATCATGCATATACTGTTTTCTTTTTCTTTTTTTTAGGGTACTAATTTGCAGCTTTTGATATTGAGAGGA…	ATGGGTAGTTTGGAAGTTGAGAAGAAAACCATAGGCTGGGCTGCCAAAGATCCTTCCGGT GTTCTGTCACCCTATTCCTACACTCTCAGAAAGACAGGCCCTGAAGATGTTGAAATCAAG GTGTTGTGCTGTGGACTCTGTCATACTGATCTTCACCAGGTCAAGAATGATCTTGGCATG TCCAATTACCCCATGGTTCCTGGACATGAAGTGGTTGGTGAAGTTGTGGAGGTTGGATCC AATGTCGCCAAGTTCAATGTGGGAGACACTGTTGGAGTAGGCGTGCTCGTCGGATGTTGC AGGAGCTGCCGCCCTTGCAACCAAGACATTGAGCAATACTGCAATAATAGGATCTGGAGC TACAATGATGTCTACTCTGATGGCAAACCTACC…
Nsyl0426890	XM_009780331	ATGTTCCAAACAATGAGGTTGCCAGACATGTTCCGGATAACCCCCAGTCATCGGGTGGATATTATGGAGCAGTTTGTAATAAATATGTTGGATATGTACGTCAAGGTCGAAGATGTTCCAAACAATGAGGTGGCCAGACATGTTCCGGATAACCCCCAGTCATCGACTGGCTATTCTGGAGGAGTTTTTGCTGGACATGTTCCCGATGAAAGAGTTTTCCTTGATTTAAACTTATCCCCACCTGCTTTACATAATTCACAAGACGAGTGGTAAGCTTCAATTTTCCTTTGTGGTACGATGTACAATTTTGTTGTATTCAATTTGTATTAACGCTCATATATTTAACAGGGGGTACAAGCCGGATATGAGTTTTATAAATAATGAACCCGAGCATAGTTT…	ATGTTCCAAACAATGAGGTTGCCAGACATGTTCCGGATAACCCCCAGTCATCGGGTGGAT ATTATGGAGCAGTTTGTAATAAATATGTTGGATATGTACGTCAAGGTCGAAGATGTTCCA AACAATGAGGTGGCCAGACATGTTCCGGATAACCCCCAGTCATCGACTGGCTATTCTGGA GGAGTTTTTGCTGGACATGTTCCCGATGAAAGAGTTTTCCTTGATTTAAACTTATCCCCA CCTGCTTTACATAATTCACAAGACGAGTGGGGGTACAAGCCGGATATGAGTTTTATAAAT AATGAACCCGAGCATAGTTTTGGTGTGTTGGATCAAAGTGGTCCATCCAGGAGCTATCAC CTACATGAAAATATCCATCATGAAATTTCATCA…
Nsyl0459450	XM_009769306.1	ATGGCTCAAACAACACCAAATCACACACAAAGTGTTTCTGGTTGGGCAGCTCATGATTCTTCTGGCAAGATCACACCTTTTACCTTCAAGAGAAGGTAAATAATATTTACCCCTTTTTTGGGCATTTTCTTATCCTTTGTATGAATTGTTGGATTTAGGTTATGTTATGGAAAAATATAAACTGTATACCCGCTGTAAAAATAATAGCCGAAAAAGTGTATAATATTTGTATATTTTGTTTGTGTATATATATATACACATTCTGTATGTTATATACAAAAATTATACAAATTTTATATACTTTTTCGGCTATCAGATATAAATAGTTTCTGACGGAGGCTAAAAGTGATAATACTCTTTATGTTATGCTGGCGGTGTAAATATTTTCTACAATACTAA…	ATGGCTCAAACAACACCAAATCACACACAAAGTGTTTCTGGTTGGGCAGCTCATGATTCT TCTGGCAAGATCACACCTTTTACCTTCAAGAGAAGAGAAAATGGTGAGAATGATGTGAGC ATTAGGATCTTGTATTGTGGCATGTGTCATACGGATCTTCATCATGTGAAGAACGATTGG GGCATTACTATGTACCCTGTCGTGCCTGGGCATGAGATAACTGGGATTATAACAAAAGTG GGAAGCAATGTGACAAAATTCAAGAATGGAGATAGAGTAGGGGTAGGTTGTTTGGCAGCA ACATGTTTGAAGTGTGAGTATTGTAAGGACTCCCAAGAGAACTATTGTGACCAAGTCCAA TTCACTTATAATGGCATTTTTTGGGATGGTACC…
Nsyl0093350	XM_009777260.1	ATGGCTAAAACAACCCCAAACCACACTCAAGTTGTTTCAGGATGGGCAGCTCTTGATTCTTCTGGCAAGATCACACCTTACATTTTCAATAGAAGGTATTCGTGATTTTCATGTATAAATATCTTTGCTACGTAATATATAGTATTCCATTTTATATGACACTCCATTTATTTTAGTCAGTTCCACAAAGAATCATGCACTTCTATATTTATGAACTTTTTAATTGTTAACTTTTCATTTGCTCTTGATTACATGCTCTTATAGCTAGAAAAGTGTTATAAGATGTTTAACACTACAAGTTCTAAGAATATTTTTGGCATATATTAAAAGTCTTCGCAAACTTTGTACTTAGTCAAACTATAAATGCCCTCGTATGAAGCGGAAGGGACGGAGTATTAT…	ATGGCTAAAACAACCCCAAACCACACTCAAGTTGTTTCAGGATGGGCAGCTCTTGATTCT TCTGGCAAGATCACACCTTACATTTTCAATAGAAGAGAGAATGGTGTAAATGATGTGACC ATCAAGATTTTATACTGCGGAATCTGCCATACTGACCTTCACTATGCCAAAAATGATTGG GGTATCACTATGTATCCTGTTGTTCCTGGGCATGAGATTACAGGGATTGTTGTGGAAGTT GGGAGCAATGTAACCAACTTCAAAACAGGGGATAAAGTAGGAGTTGGATGCATGTCAGCA TCTTGCTTAGAATGTGAATTTTGTAAAAACTCAGAAGAGAATTATTGTGACAAAGTTCAA TTCACATATAATGGTGTCTTTTGGGATGGTAGC…
Nsyl0054440	XM_009775145.1	ATGGTTAAAGCACCAGAGAACGAACACCCACAAAAAGCTTTTGGGTGGGCTGCTAGGGAC ACCTCCGGAATTCTGTCGCCGTTCGATTTCTCTCGGAGGTAGGTAGCGCTACTTTTTGTT TGATGTTTATTTAACGTCTGGTAAATTGTTGGGTGTATTAATATTAATGTATGTCTCTGA AATGGAAGGACTTAAAAATGCTTAACTGTAACTTTTCATGCTATATCCATTCTTTGATGA TTGCCATTAATTTTGCTCTTCACATACCTATACGACGTATATATATTTCGGTACATAAGC ATGCATGACTTGACTTTGATTTAGTGGTGAGAGCATGGTAATGTCTTAATTATGGGCACA TCTCAAGTTACTCTGTTGGTGCGGAGTTCCAAT…	ATGGTTAAAGCACCAGAGAACGAACACCCACAAAAAGCTTTTGGGTGGGCTGCTAGGGAC ACCTCCGGAATTCTGTCGCCGTTCGATTTCTCTCGGAGACAAAATGGTGATGATGATGTT ACTGTCAGGATACTTTACTGTGGCGTATGTCACTCCGACTTGCATTGTTTGAAGAATGAG TGGGGATTCACAAAATACCCTATCGTCCCTGGGCATGAAATTGTTGGTCTAGTGACTGCA GTTGGCACTAGTGTCCATAGATTCAAGGTTGGTGACCGAGTTGGAGTTGGAGTGATTGTA GGCTCCTGTCACACGTGTGATATCTGTGAACAGAGCTTGGAAAACTATTGTCCCAAAGTT ATGTTCACCTACAACTCCACATACCATGACGGT…
Ntom0265640	XM_009630979.3	ATGGGTGGCTTGGAAGTTGAGAAAACAACTATTGGTTGGGCTGCTAGAGACCCTTCTGGTGTACTTTCACCTTATACCTATACTCTCAGGTACATTACATTACTACTTATGTTCTTTCTATAATCGTAATATCCGAATCAGCTTATGCTTACCTCGACTACTTATTTTTATCTTATAATAACTATTCTACCAATTTTAAGATGAGTTATGAACTTTGTTTTTTGTTTTTCATGTCCAGAAACACAGGACCTGAAGATGTGGAAGTCAAAGTTTTGTATTGTGGGCTCTGCCACACTGATCTTCACCAAGTTAAAAATGATCTTGGCATGTCCAACTACCCTCTGGTTCCTGGGTATTTGCTCTTCCCTCTCTATTTTCCCTGTTTTTTCTCTCTCTATA…	ATGGTTAAAGCACCAGAGAACGAACACCCACAAAAAGCTTTTGGGTGGGCTGCTAGGGAC ACCTCCGGAATTCTGTCGCCGTTCGATTTCTCTCGGAGACAAAATGGTGATGATGATGTT ACTGTCAGGATACTTTACTGTGGCGTATGTCACTCCGACTTGCATTGTTTGAAGAATGAG TGGGGATTCACAAAATACCCTATCGTCCCTGGGCATGAAATTGTTGGTCTAGTGACTGCA GTTGGCACTAGTGTCCATAGATTCAAGGTTGGTGACCGAGTTGGAGTTGGAGTGATTGTA GGCTCCTGTCACACGTGTGATATCTGTGAACAGAGCTTGGAAAACTATTGTCCCAAAGTT ATGTTCACCTACAACTCCACATACCATGACGGT…
Ntom0118530	XM_009590902.3	ATGATTGTCAGACATGAAATTGTGGGAACTGTGAGAGATGTTGGCACCAATGTTAAGCACTTTAAAGTTGGCGACCATGTTGGTGTTGGAACATACGTTAATTCATGCAGGGAATGTGAATATTGTAATGATGGATTAGAGGTTCATTGCTCAAAAGGAGCAGTATACACTTTTGATGGTATAGACGTGGATGGTACAGTTACTAAAGGGGGATACTCCAGTTACATTGTTGTTCATGAAAGGTTAATTTATCTGACTCTCTAACAAATTATGTATCGTTCTCACCCCACCCTAAGTCCCCCAATCTTTAATTTTACATGGACCAAATGGTCTATCAAATACAATCATTGTATAATTTACTGATAAATGCCTGCTTGTATGTACAGGTACTGCTTTAGA…	ATGATTGTCAGACATGAAATTGTGGGAACTGTGAGAGATGTTGGCACCAATGTTAAGCAC TTTAAAGTTGGCGACCATGTTGGTGTTGGAACATACGTTAATTCATGCAGGGAATGTGAA TATTGTAATGATGGATTAGAGGTTCATTGCTCAAAAGGAGCAGTATACACTTTTGATGGT ATAGACGTGGATGGTACAGTTACTAAAGGGGGATACTCCAGTTACATTGTTGTTCATGAA AGGTACTGCTTTAGAATACCTGAAAATTACCCGCTTGCATCTGCAGCACCTTTACTATGT GCTGGAGTTACTGTCTATACTCCGATGATGAGACATAACATGAATCAACCTGGAAAATCT CTTGGTGTGATTGGATTAGGTGGTCTAGGTCAC…
Ntom0311040	XM_009598055.3	ATGGCTAAAACAACCCAAAACCACACTCAAGTTGTTTCAGGATGGGCAGCTCTTGATTCTTCTGGCAAGATCACACCTTATATTTTCAATAGAAGGTATTCGTGATTTTCATGCATAAATATCTTTGCTACATAATATATATTCCATATTATATGATACTTTATTCATTTTAGTCTGTTCCAAAAAGAATAATGTATTTCTATATTTTTAAACTTTTTAATTTTTAACTTTTCATTTTGCTCTTGATTACATGTTCTTATAGCTAGAAAAGTTTTATAAGATTACAAGTTCTAGGAATATTTTTGGCATATATTAAAAGTCTTCTACTTAGTCAAACTTTAAATCGTCTTCATATGAAGCGGAAGGGACGAAGTATTATACATTATAGTACTAAAGACA…	ATGGCTAAAACAACCCAAAACCACACTCAAGTTGTTTCAGGATGGGCAGCTCTTGATTCT TCTGGCAAGATCACACCTTATATTTTCAATAGAAGAGAGAATGGTGTAAATGATGTGACC ATCAAGATTTTATACTGTGGAATCTGCCATACTGACCTTCACTATGCCAAAAATGATTGG GGTATCACTACGTATCCTGTAGTTCCTGGGCACGAGATTACAGGGATTGTTGTGGAAGTT GGGAGCAATGTAACCAACTTCAAAACAGGGGATAAAGTAGGAGTTGGGTGCATGTCAGCA TCTTGCTTAGAATGTGAATTTTGTAAAAACTCAGAAGAGAATTATTGTGACAAAGTTCAG TTCACTTACAATGGTGTCTTTTGGGATGGTAGT…
Ntom0224390		ATGTCTTGGATTTTTCATGAATTTGCTAGTTTAATGTCAAAAGTTTGCTTATGTTTCAGC TTAAGGAGCTTACTTCTGTGCAGTCATGAAATTGTTGGTCTCGTGACTGCAGTTGGCACT AGTGTCCATAGATTCAATGTTGGTGACCGAGTTGGAGTTGGAGTGATTGTAGGCTCCTGT CAAACGTGTGATATCTGTGAACAGAGCTTGGAAAGCTATTGTCTCAAAGTTATGTTCACC TACAACTCCACATACCATGACGGTACAAAGACATATGGTGGTTACTCCGATATGATAGTT GTTCATCAGCGCTTTGTTCTTGAATTTCCTGAAAATCTACCTTCTGATGCTGGAGCACCT TTATTATGTGCTGGAATCACTGTATACAGCCCA…	ATGTCTTGGATTTTTCATGAATTTGCTAGTTTAATGTCAAAAGTTTGCTTATGTTTCAGC TTAAGGAGCTTACTTCTGTGCAGTCATGAAATTGTTGGTCTCGTGACTGCAGTTGGCACT AGTGTCCATAGATTCAATGTTGGTGACCGAGTTGGAGTTGGAGTGATTGTAGGCTCCTGT CAAACGTGTGATATCTGTGAACAGAGCTTGGAAAGCTATTGTCTCAAAGTTATGTTCACC TACAACTCCACATACCATGACGGTACAAAGACATATGGTGGTTACTCCGATATGATAGTT GTTCATCAGCGCTTTGTTCTTGAATTTCCTGAAAATCTACCTTCTGATGCTGGAGCACCT TTATTATGTGCTGGAATCACTGTATACAGCCCA…
